# Supplementary material for: Characterization of hydrogenated graphite powder by X-ray photoelectron spectroscopy and time-of-flight secondary ion mass spectrometry
Source: Royal Society of Chemistry journal article supplement (doi:10.1039/c6ra17954a), 2016-01-01
Supplement: c6ra17954a1.pdf [file c6ra17954a1.pdf]

## Electronic Supplementary Information (ESI)

# Characterization of Hydrogenated Graphite Powder by X-ray Photoelectron Spectroscopy and Time-of-Flight Secondary Ion Mass Spectrometry

Wenjing Xie,<sup>a</sup> Kai Mo Ng,<sup>b</sup> Lu-Tao Weng<sup>cd</sup> and Chi-Ming Chan<sup>\*ac</sup>

<sup>a</sup> Division of Environment

<sup>b</sup> Advanced Engineering Materials Facility

<sup>c</sup> Department of Chemical and Biomolecular Engineering

<sup>d</sup> Materials Characterization and Preparation Facility

Hong Kong University of Science and Technology

Clear Water Bay, Kowloon

Hong Kong

\* Corresponding author.

E-mail address: [kecmchan@ust.hk](mailto:kecmchan@ust.hk) (C.M. Chan)

**Table S1** Results of a peak synthesis of the C1s peak of graphite powder and hydrogenated graphite powder

| Sample                                                | Peak                     | Binding Energy<br>(eV) | Area Ratio<br>(%) | FWHM<br>(eV) |
|-------------------------------------------------------|--------------------------|------------------------|-------------------|--------------|
| Graphite powder<br>annealed at 500 °C                 | Total C1s                | 284.6                  | 100.0             | 1.0          |
|                                                       | C-C (sp <sup>2</sup> )   | 284.6                  | 80.1              | 0.8          |
|                                                       | C-C (sp <sup>3</sup> )   | 285.2                  | 7.2               | 1.0          |
|                                                       | C-O                      | 286.5                  | 2.5               | 1.0          |
|                                                       | C(O)O                    | 288.0                  | 1.1               | 1.0          |
|                                                       | $\pi$ - $\pi^*$ shake-up | 291.0                  | 9.1               | 3.1          |
| Hydrogenated<br>graphite powder<br>annealed at 500 °C | Total C1s                | 285.0                  | 100.0             | 1.3          |
|                                                       | C-C (sp <sup>2</sup> )   | 284.6                  | 39.2              | 0.8          |
|                                                       | C-C (sp <sup>3</sup> )   | 285.2                  | 51.8              | 1.0          |
|                                                       | C-O                      | 286.5                  | 3.6               | 1.0          |
|                                                       | C(O)O                    | 288.0                  | 1.0               | 1.0          |
|                                                       | $\pi$ - $\pi^*$ shake-up | 290.8                  | 4.4               | 3.1          |

**Table S2** Residual standard derivation of C1s curve-fitting of graphite powder and hydrogenated graphite powder

| Sample                                                | No. | Binding energy of<br>sp <sup>3</sup> carbons (eV) | Residual Standard<br>Deviation |
|-------------------------------------------------------|-----|---------------------------------------------------|--------------------------------|
| Graphite powder<br>annealed at 500 °C                 | 1   | 285.1                                             | 4.350                          |
|                                                       | 2   | 285.2                                             | 4.347                          |
|                                                       | 3   | 285.3                                             | 4.387                          |
|                                                       | 4   | 285.4                                             | 4.366                          |
|                                                       | 5   | 285.5                                             | 4.376                          |
| Hydrogenated<br>graphite powder<br>annealed at 500 °C | 1   | 285.1                                             | 3.801                          |
|                                                       | 2   | 285.2                                             | 2.595                          |
|                                                       | 3   | 285.3                                             | 2.726                          |
|                                                       | 4   | 285.4                                             | 4.186                          |
|                                                       | 5   | 285.5                                             | 6.442                          |

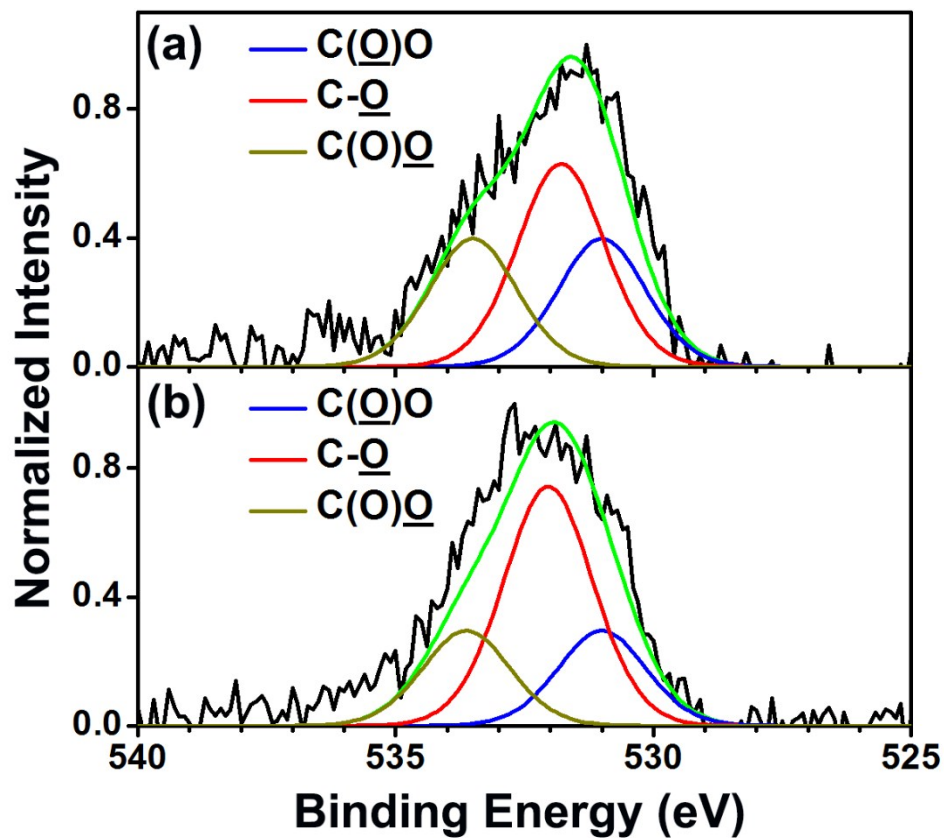

**Fig. S1** (a) XPS O1s normalized spectra of graphite powder after 500 °C annealing and (b) hydrogenated graphite powder after 500 °C annealing. The black (—) and green (—) lines represent the experimental and curve-fitted spectra, respectively. Both spectra were obtained at 500 °C.

**Table S3** Results of a peak synthesis of the O1s peak of graphite powder and hydrogenated graphite powder

| Sample                                                | Peak           | Binding Energy<br>(eV) | Area Ratio<br>(%) | FWHM<br>(eV) |
|-------------------------------------------------------|----------------|------------------------|-------------------|--------------|
| Graphite powder<br>annealed at 500 °C                 | Total O1s      | 531.6                  | 100.0             | 3.2          |
|                                                       | C( <u>O</u> )O | 531.0                  | 27.9              | 2.0          |
|                                                       | C-O            | 531.8                  | 44.2              | 2.0          |
|                                                       | C(O) <u>O</u>  | 533.5                  | 27.9              | 2.0          |
| Hydrogenated<br>graphite powder<br>annealed at 500 °C | Total O1s      | 531.9                  | 100.0             | 2.9          |
|                                                       | C( <u>O</u> )O | 531.0                  | 21.9              | 2.0          |
|                                                       | C-O            | 532.0                  | 56.2              | 2.0          |
|                                                       | C(O) <u>O</u>  | 533.6                  | 21.9              | 2.0          |
